# Supplementary material
Source: ML conference proceedings conference paper supplement (https://openaccess.thecvf.com/content/ICCV_2019/html/Nguyen_Weakly-Supervised_Action_Localization_ICCV_2019_paper.html)
Supplement: Supplementary file 1 [file Nguyen_Weakly-Supervised_Action_Localization_ICCV_2019_supplemental.zip]

# Weakly-supervised Action Localization with Background Modeling Supplementary Materials

Phuc Xuan Nguyen  
University of California, Irvine  
nguyenpx@ics.uci.edu

Deva Ramanan  
Carnegie Mellon University  
deva@cs.cmu.edu

Charless C. Fowlkes  
University of California, Irvine  
fowlkes@ics.uci.edu

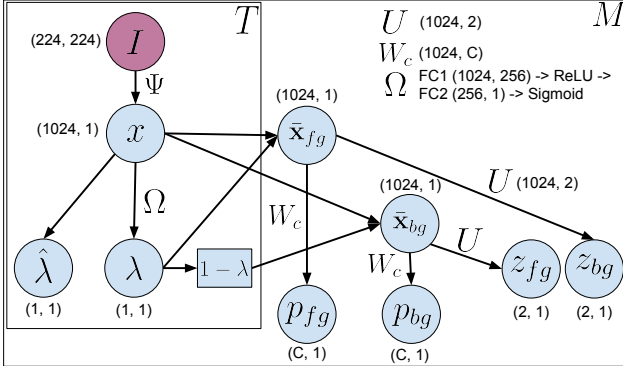

Figure 1: Network architecture for our weakly supervised action localization model.

## 1. Network Architecture

Figure 1 shows the overall network architecture with the dimensions for the internal components along with dimensions of the parameters.

## 2. Micro-videos

Micro-videos are obtained from using a third-party Instagram API<sup>1</sup>. Videos are kept untrimmed through the process. No video editing or temporal annotation is involved. We curate user-provided tags into weak video-level labels by removing duplicate and mis-tagged videos. The background fraction in MVs ranges from 10-50%. This cheaply acquired additional dataset was sufficient to bridge the gap between weakly-supervised and fully-supervised methods at lower IoUs. To improve at higher IoUs, models likely need to factor in the domain shift between MVs and THUMOS14 videos, as pointed out in [2].

## 3. Extra results

Table 1 shows the ablation study for the post-processing procedure. While our method benefits greatly from the new

Table 1: Results on THUMOS-14.

| Methods                     | 0.3  | 0.4  | 0.5  | 0.6  | 0.7 |
|-----------------------------|------|------|------|------|-----|
| STPN (re-implementation)    | 34.2 | 24.7 | 15.4 | 8.2  | 3.7 |
| STPN w/ our post-process    | 35.1 | 25.1 | 14.9 | 7.5  | 3.4 |
| Ours w/ STPN's post-process | 37.3 | 29.9 | 21.5 | 14.2 | 7.6 |
| Ours                        | 46.6 | 37.5 | 26.8 | 17.6 | 9.0 |

post-processing, STPN [1] does not. The new procedure aggressively generates many more proposals by using a large number of fine-grained thresholds, operating at much higher recall. STPN's precision suffers due to lower-quality intermediate outputs (attention/TCAMs) and doesn't benefit from our post-processing. It is the conjunction of background modeling and postprocessing that yields the large performance gain

## References

- [1] Phuc Nguyen, Ting Liu, Gautam Prasad, and Bohyung Han. Weakly supervised action localization by sparse temporal pooling network. *CVPR*, 2018.
- [2] Phuc Xuan Nguyen, Gregory Rogez, Charless Fowlkes, and Deva Ramanan. The open world of micro-videos. *CVPR BigVision Workshop*, 2016.

<sup>1</sup><https://github.com/althonos/InstaLooter>
