# Supplementary material
Source: ML conference proceedings conference paper supplement (https://openaccess.thecvf.com/content/ICCV_2019/html/Nguyen_Weakly-Supervised_Action_Localization_ICCV_2019_paper.html)
Supplement: Supplementary file 2 [file Nguyen_Weakly-Supervised_Action_Localization_ICCV_2019_supplemental.zip]

# Weakly-supervised Action Localization with Background Modeling

ICCV2019 Submission #6496

Paper Summary



# What are in this summary?

1. Motivations
2. High-level ideas of our architecture
3. Quantitative results summaries on THUMOS14
  - a. Ours vs STPN
  - b. Ours vs weakly-supervised methods
  - c. Ours vs fully-supervised methods
4. Micro-videos as supplement training data
5. Visualizations
  - a. Highly-confident detected action instances
  - b. Failure modes.



# Action localization + Weak supervision

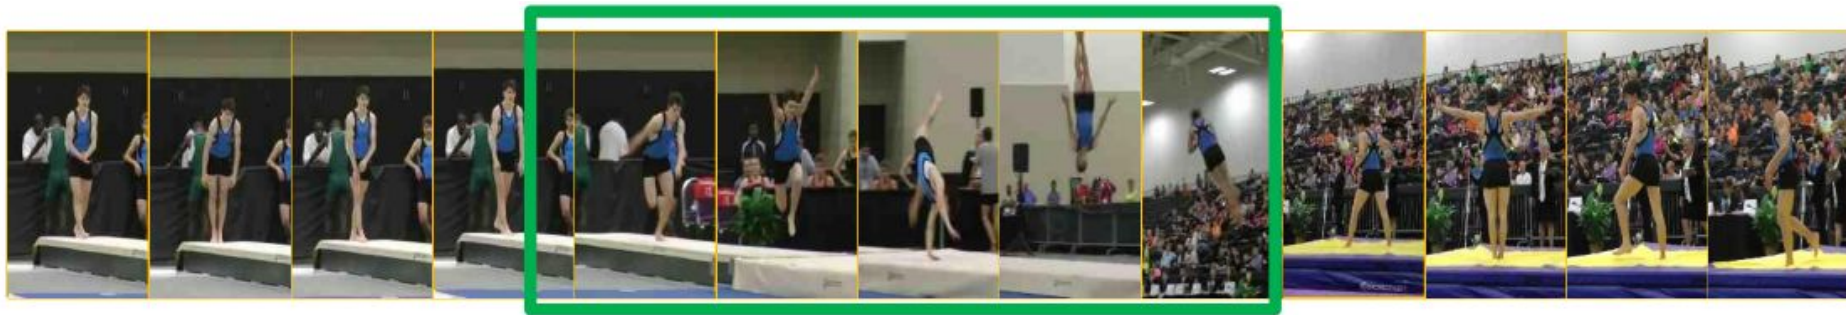

“This video contains Gymnastics action.”

**Problem:** find the temporal locations of the action within an untrimmed video using only video-level labels.

This formulation is attractive because precise boundaries are difficult to obtain.



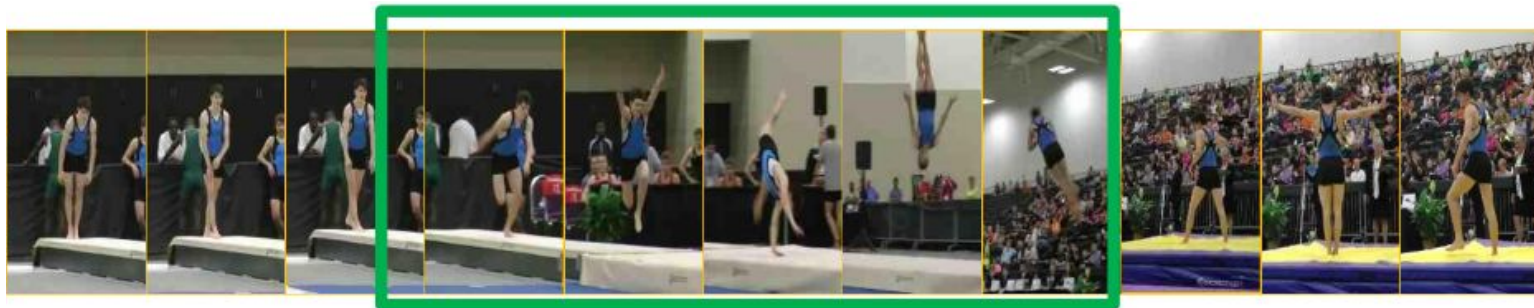

Background

Gymnastics

Background

**Full supervision - exact boundaries are known**

Background modeling is straightforward





“This video contains Gymnastics action.”

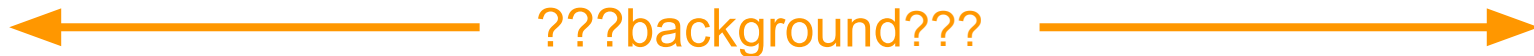

**Weak supervision - boundaries are unknown**

Background frames are often unmodeled.

In this paper, we show that models which explicitly accounts for background frames are substantially better.



# Attention is key ingredient.

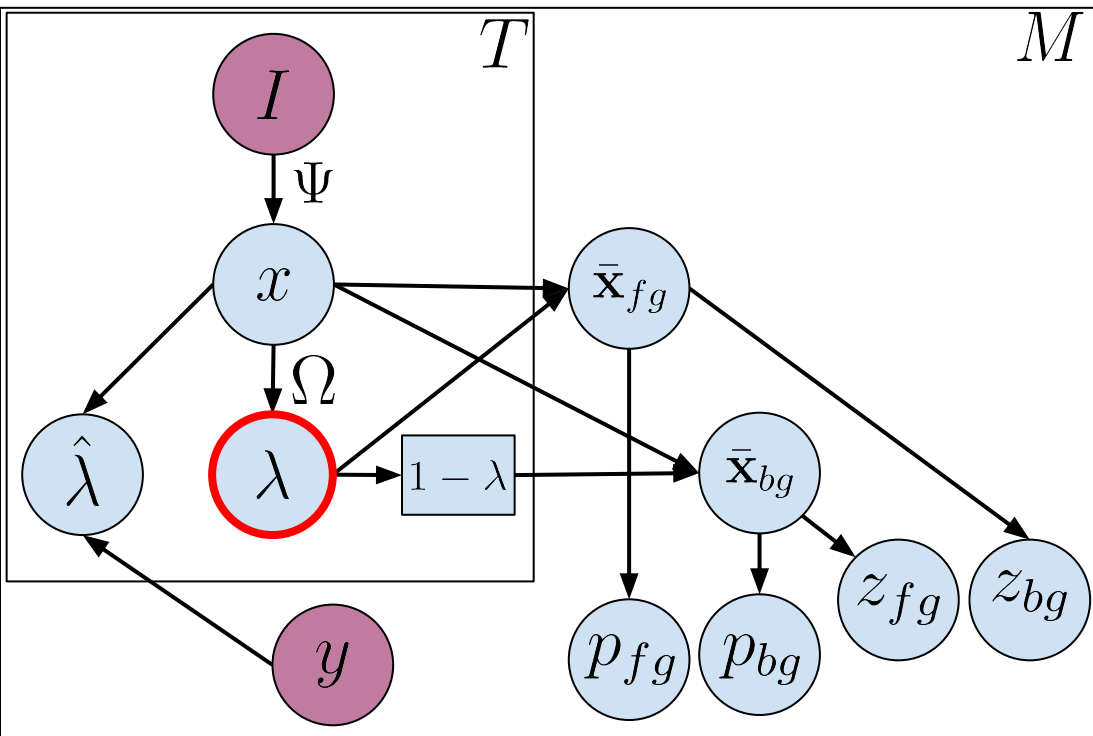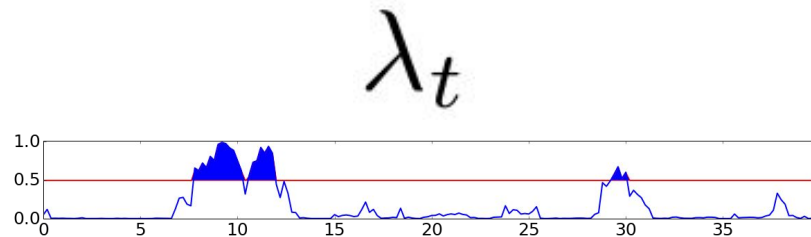

**how likely of an action at  
timestamp  $t$**



# Attention is key ingredient.

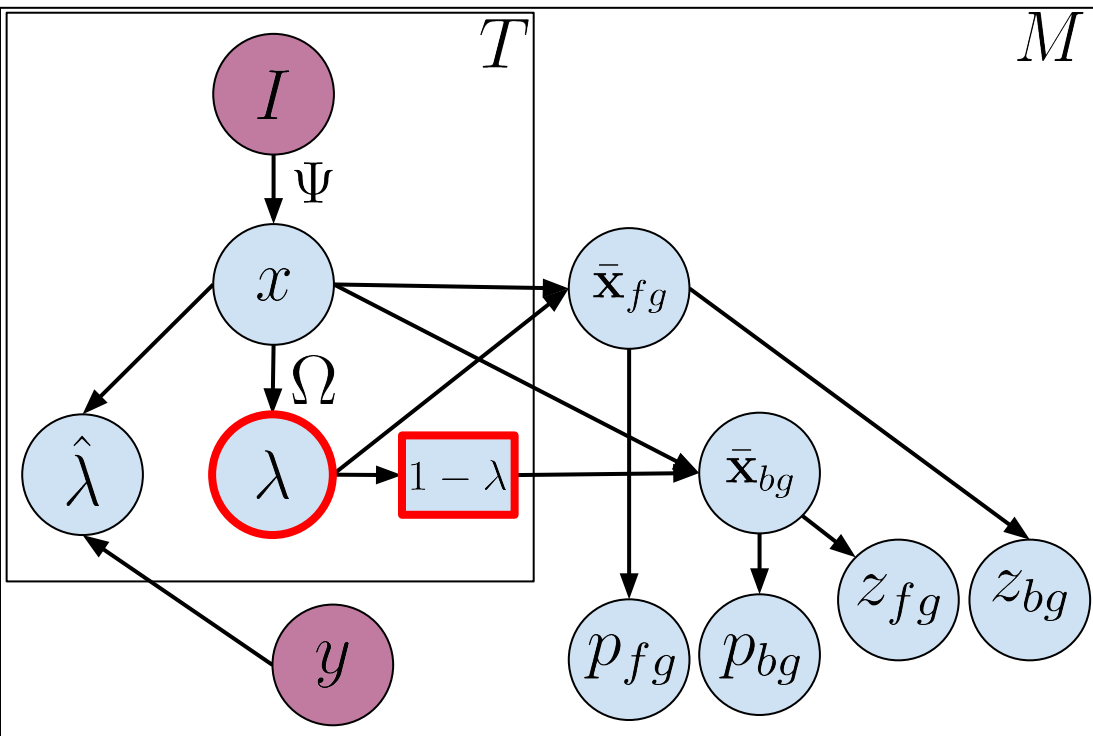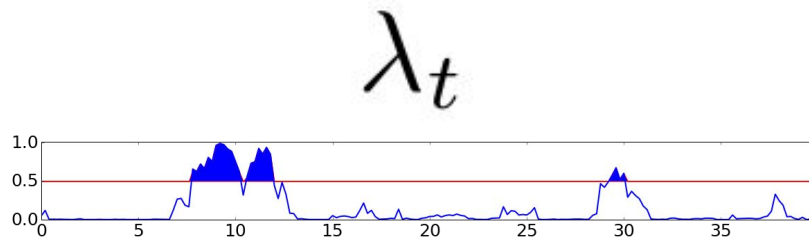

**how likely of an action at  
timestamp  $t$**

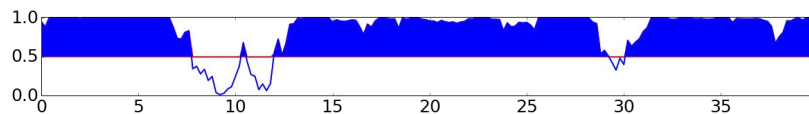

**probability of a non-event  
(background) at timestamp  $t$**



# Background-awareness loss

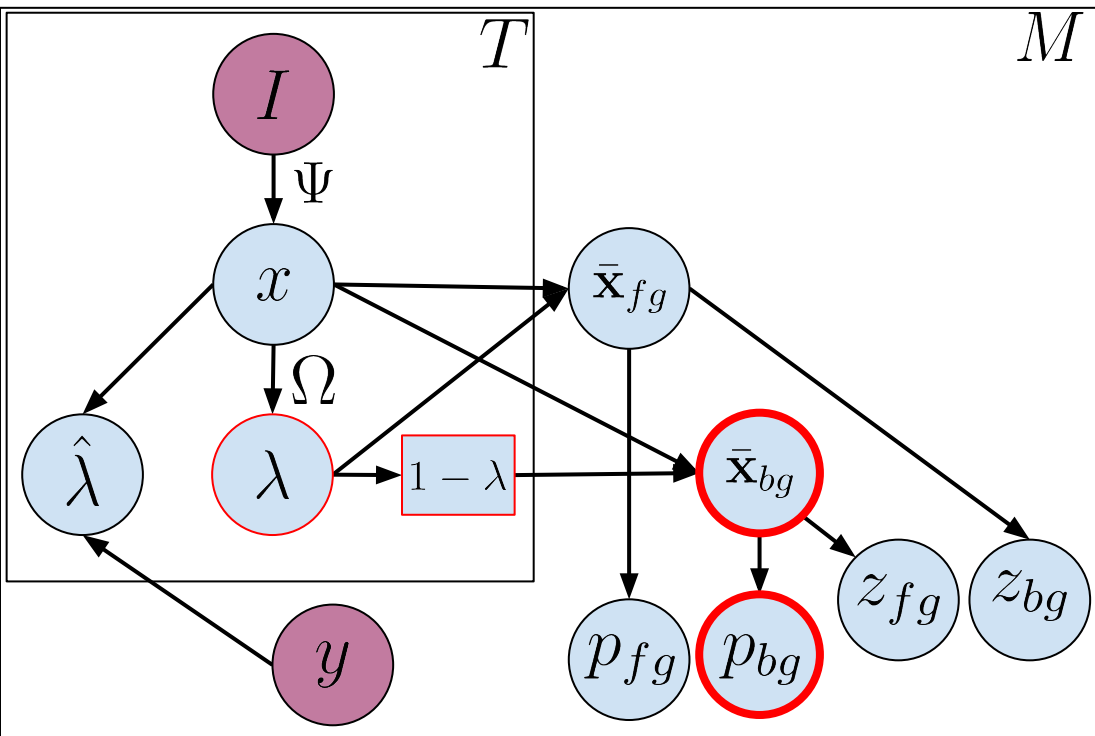

$$\mathbf{x}_{bg} = \frac{1}{T} \sum_{t=1}^T (1 - \lambda_t) \mathbf{x}_t$$

features for background concept

$$p_{bg}[c] = \frac{e^{w_c \cdot \mathbf{x}_{bg}}}{\sum_{i=0}^C e^{w_i \cdot \mathbf{x}_{bg}}}$$

softmax

$$\mathcal{L}_{bg} = -\log p_{bg}[0]$$

Background-awareness loss



# Top-down attentional cues from T-CAM

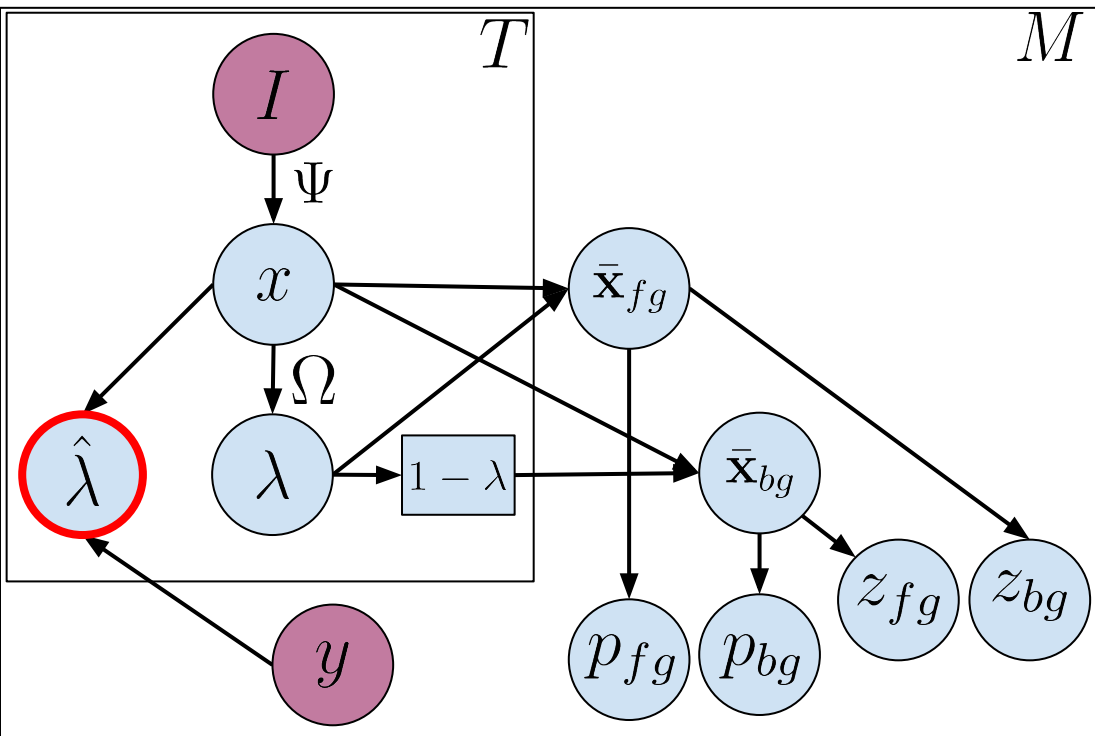

$$\hat{\lambda}_t^{\text{fg}} = G(\sigma) * \frac{e^{w_y \mathbf{x}_t}}{\sum_{i=0}^C e^{w_i \mathbf{x}_t}}$$

**Smoothed Temporal Class  
Activation Mapping (T-CAM)**

$$\mathcal{L}_{\text{guide}} = \frac{1}{T} \sum_t |\lambda_t - \hat{\lambda}_t^{\text{fg}}|$$

**Self-guided Attention Loss**



# Foreground-Background Clustering Loss

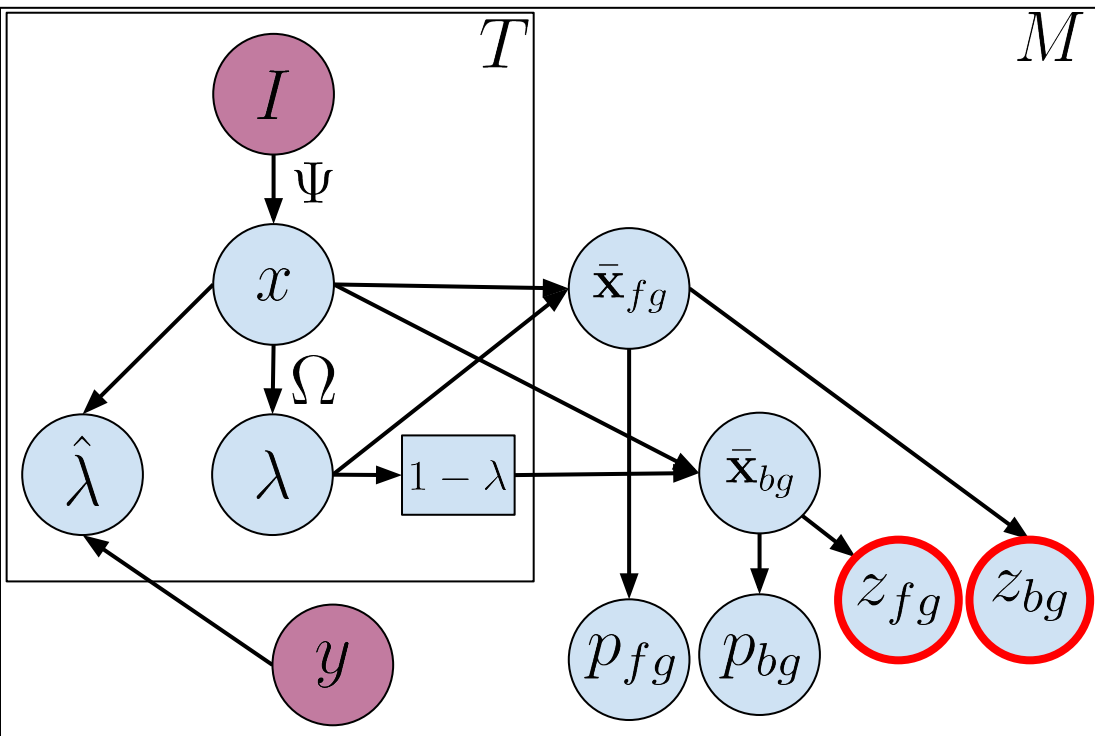

- Unsupervised loss
- Encourages foreground and background pooled features to be distinct.



# mAP@IoU - THUMOS14

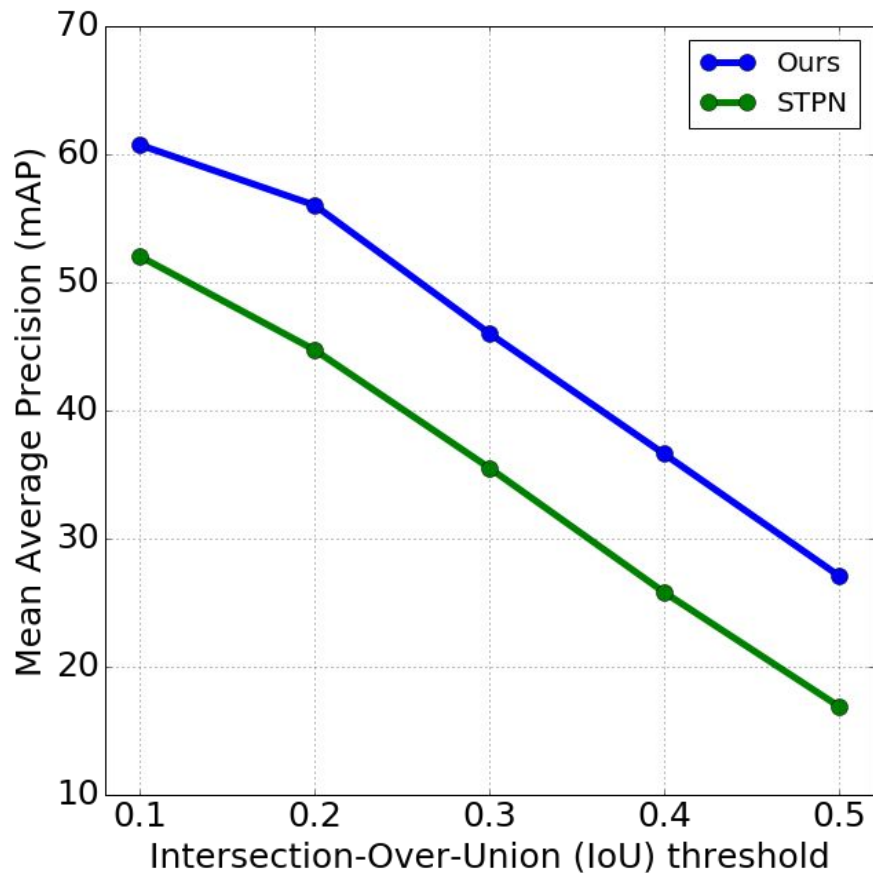

The background modeling extension gives ~10% mAP improvement across all IoU thresholds

\*higher is better



# Compared with weakly supervised SoTA

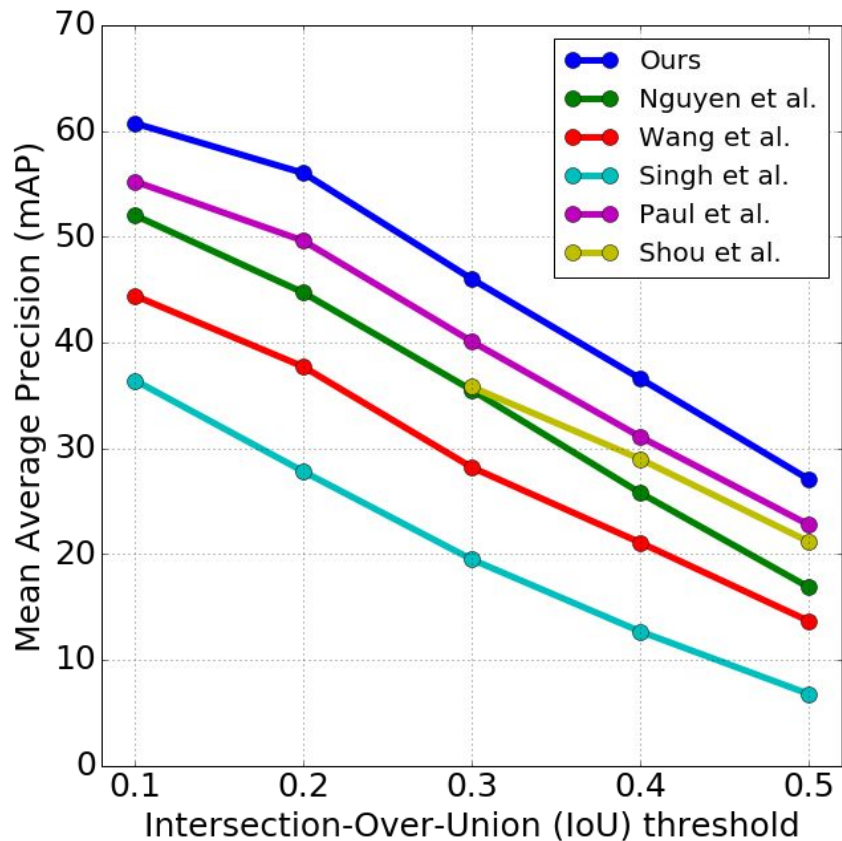

We outperforms state-of-the-art for weakly supervised action localization.



# Compared with fully supervised SoTA

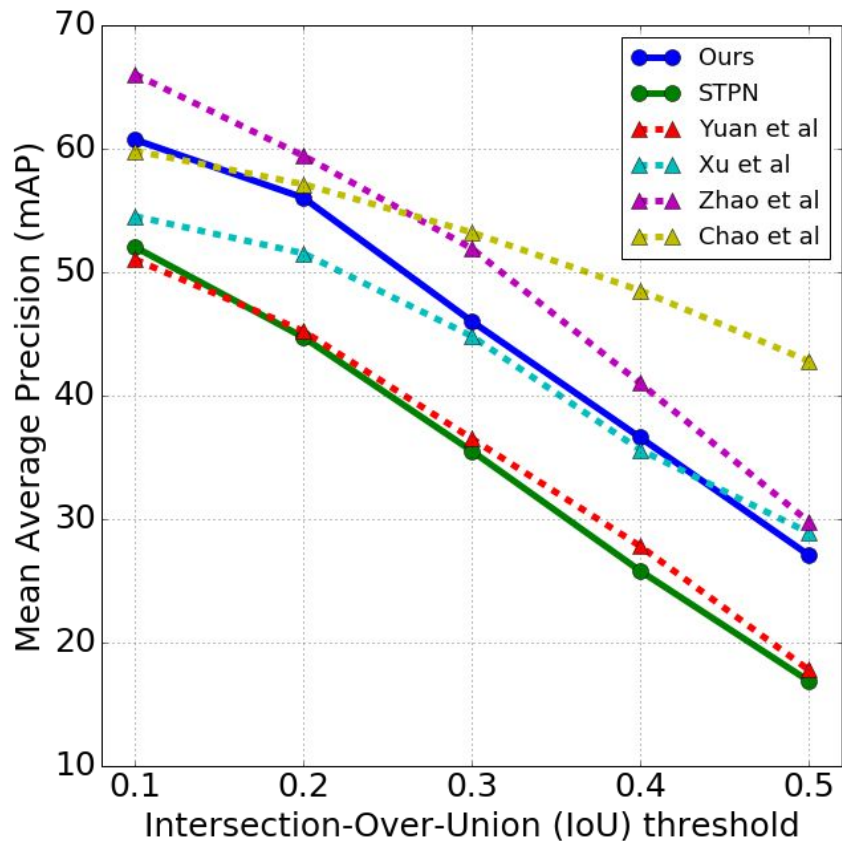

- Our methods are comparable with other fully supervised methods (dashed line).
  - Especially at lower IoUs.
- Higher IoUs requires more accurate action boundary decisions.
  - which is difficult to do without actual boundary supervision.



# Micro-videos as supplement training data

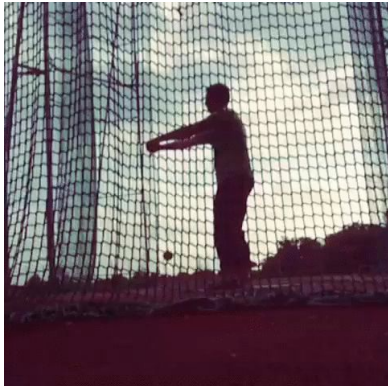

**#hammerthrow**

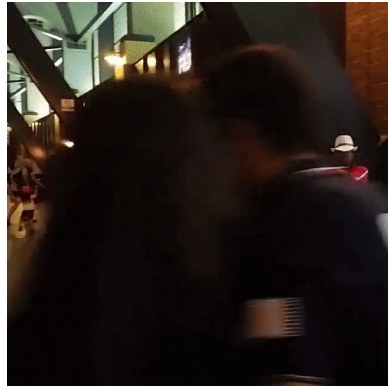

**#baseballpitch**

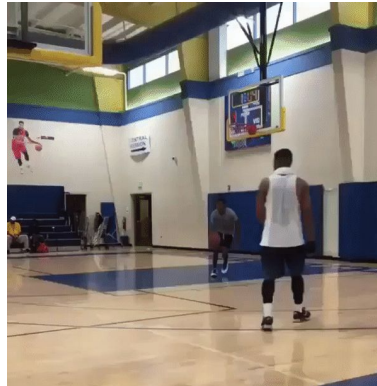

**#basketballdunk**

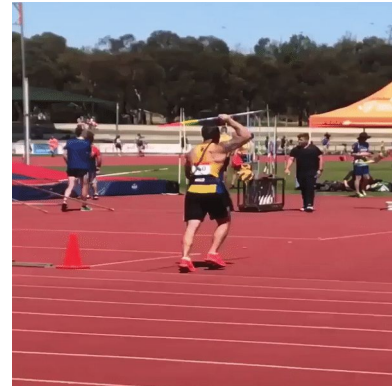

**#javelinthrow**

At the first glance, ideal source for weakly-supervised training data.



# Micro-videos as supplement training data

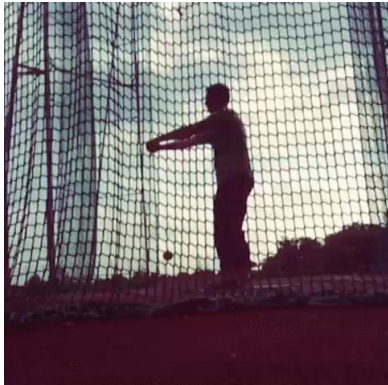

**#hammerthrow**

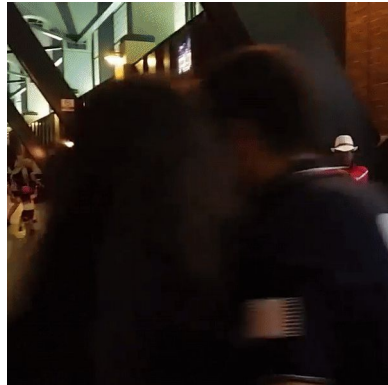

**#baseballpitch**

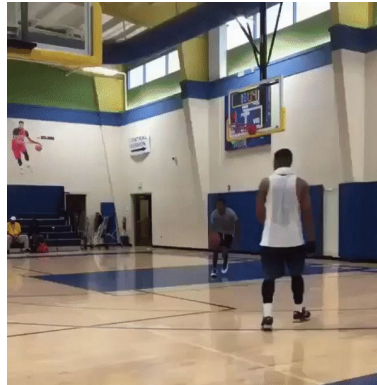

**#basketballdunk**

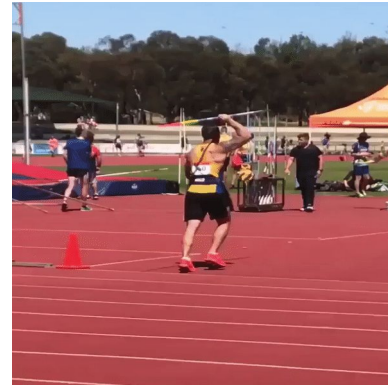

**#javelinthrow**

Would adding microvideos improve localization performance?



# With Microvideos

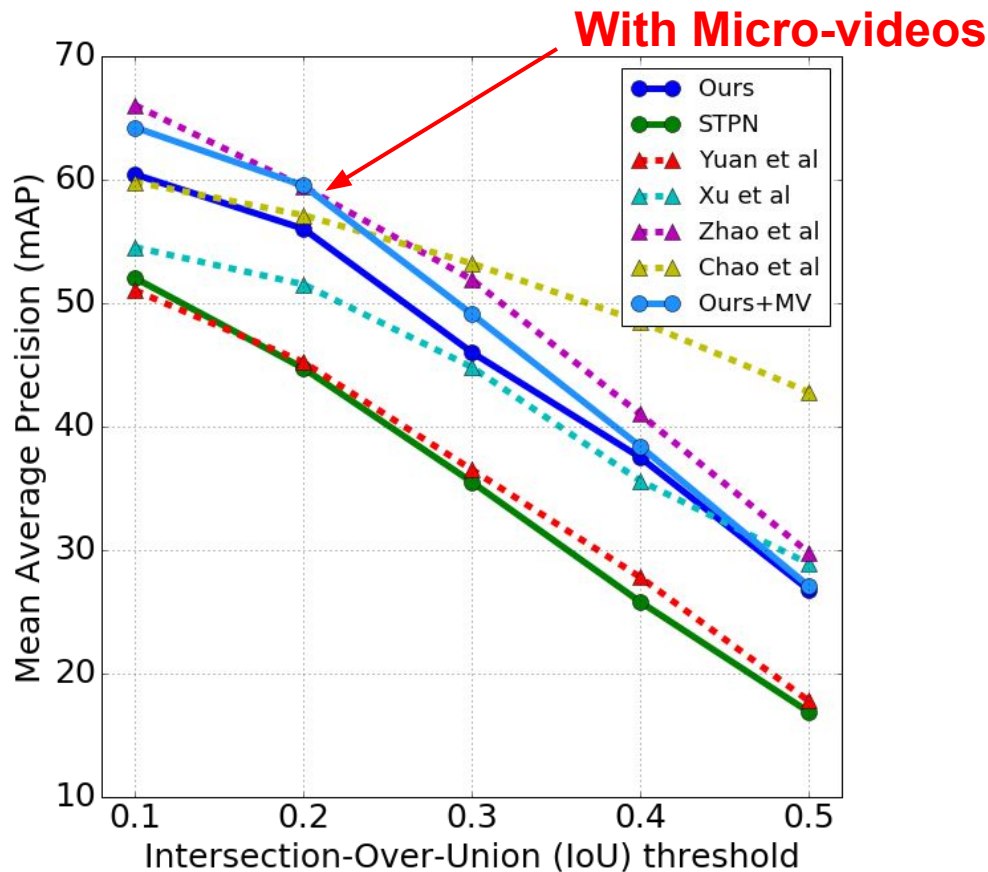

- The addition of microvideos:
  - helps improve significantly at lower IoUs
  - Better recognize the action instance.
- It doesn't help with refining the boundaries of action instances
  - which is needed for better performance on higher IoUs.



# High-Confident Detected Instances

BaseballPitch

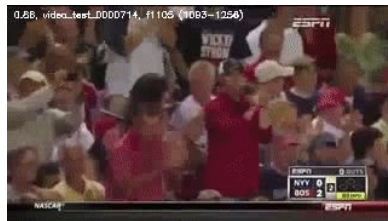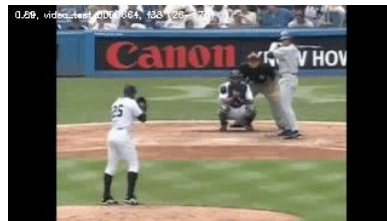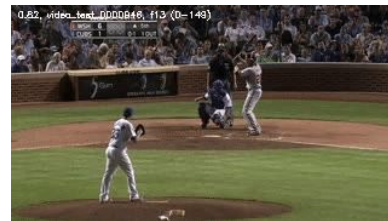

BaseballDunk

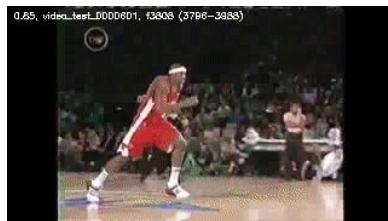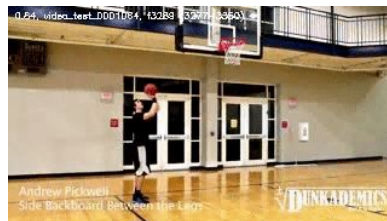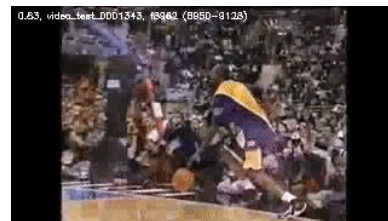

Billiards

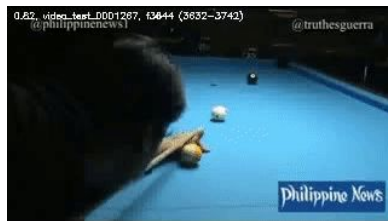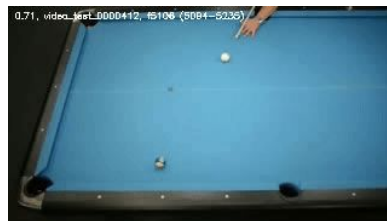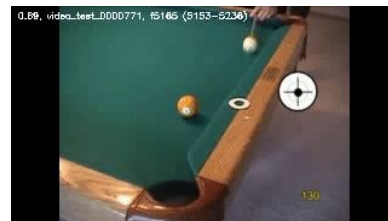



# High-Confident Detected Instances

CliffDiving

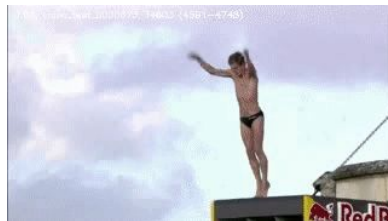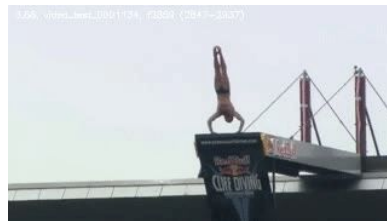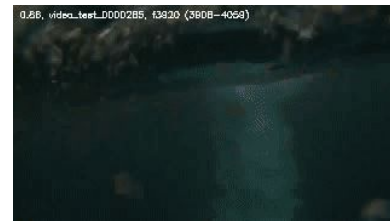

GolfSwing

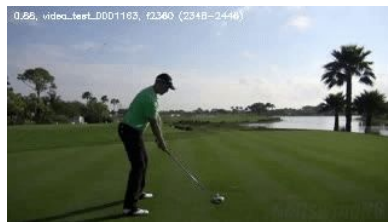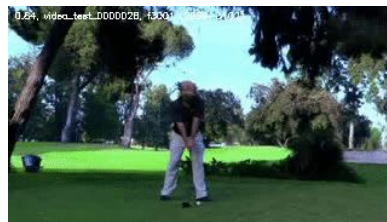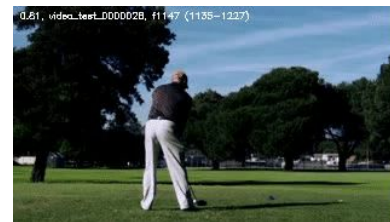

HammerThrow

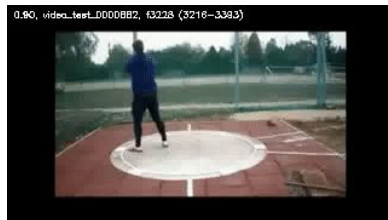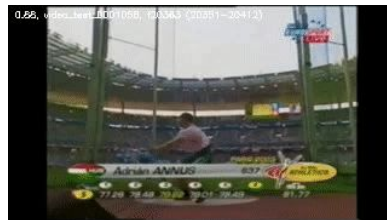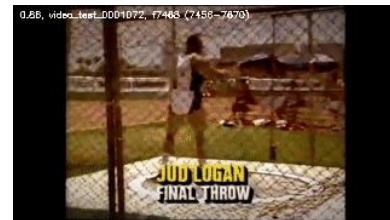



# Failure Modes (1) - Mini-action composition

Groundtruths

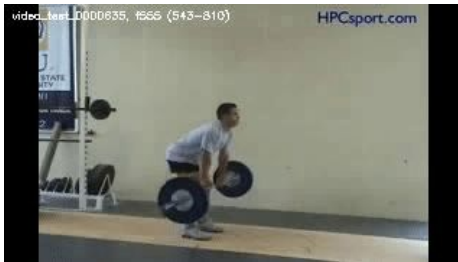

CleanAndJerk

Detections

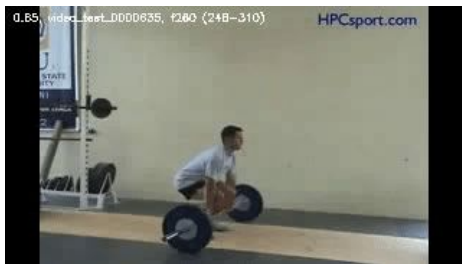

Clean

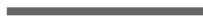

Background

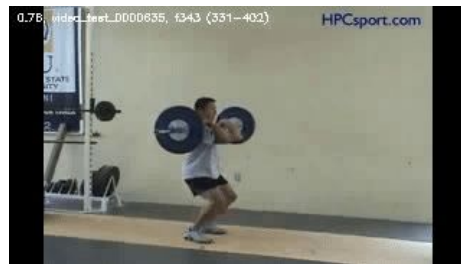

Jerk

- 'CleanAndJerk' is composed of two mini-actions, 'Clean' and 'Jerk'.
- The athlete often pauses in between, resembling background frames.
- Our model over-segments this single instance into two separate instances.



## Failure Modes (2) - Quickly Repeated actions

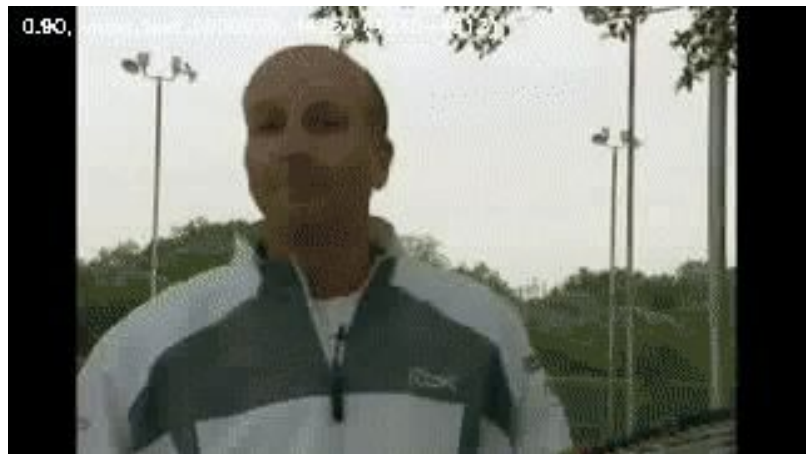

Detections

groundtruths

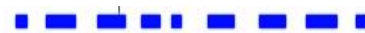

predictions

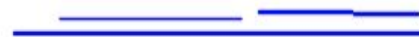

attentions

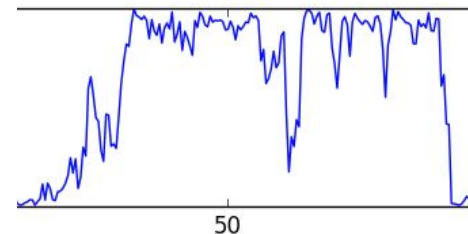

- Each 'TennisSwing' instance is followed quickly by another 'TennisSwing' instance.
- There are little 'background' in between these swings.
- Our model often outputs one **large** detection containing these instances.



# Failure Modes (3) - Human-agreed Boundaries

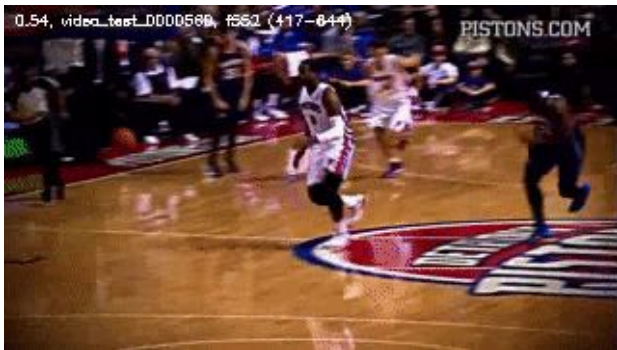

**detection**  
(at regular speed)

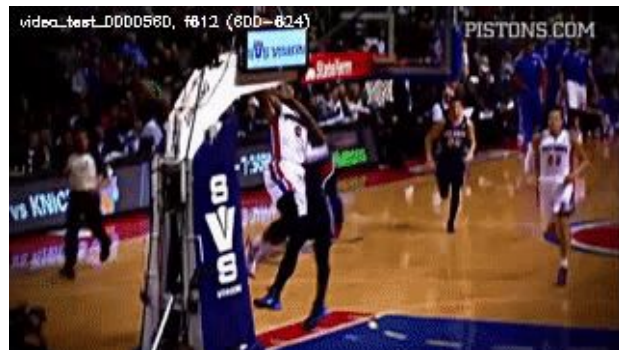

**groundtruth**  
(at 10% speed)

- 'BasketballDunk' action instances consists of
  - Run to the basket -> Jump -> Dunk the ball.
- Our model outputs the whole sequence as 'BasketballDunk' (left).
- Groundtruth segments only considers the last part as foreground (right).
- Intersection-Over-Union (IoU) < 10%
  - considered false positive.



# Thanks!

Happy Reviewings :D!
