# Supplementary material
Source: ML conference proceedings conference paper supplement (https://openaccess.thecvf.com/content/ICCV_2019/html/Nguyen_Weakly-Supervised_Action_Localization_ICCV_2019_paper.html)
Supplement: Supplementary file 3 [file Nguyen_Weakly-Supervised_Action_Localization_ICCV_2019_supplemental.zip]

Archive with 3 entries (2 files):
- suppmat/
- suppmat/ICCV2019Slides.pdf
- suppmat/iccv2019_actionloc_camera_ready_suppmat.pdf
